# Supplementary material for: Rapid, precise quantification of bacterial cellular dimensions across a genomic-scale knockout library
Source: PubMed Central journal article supplement (PMC5320674; doi:10.1186/s12915-017-0348-8), 2017-02-21

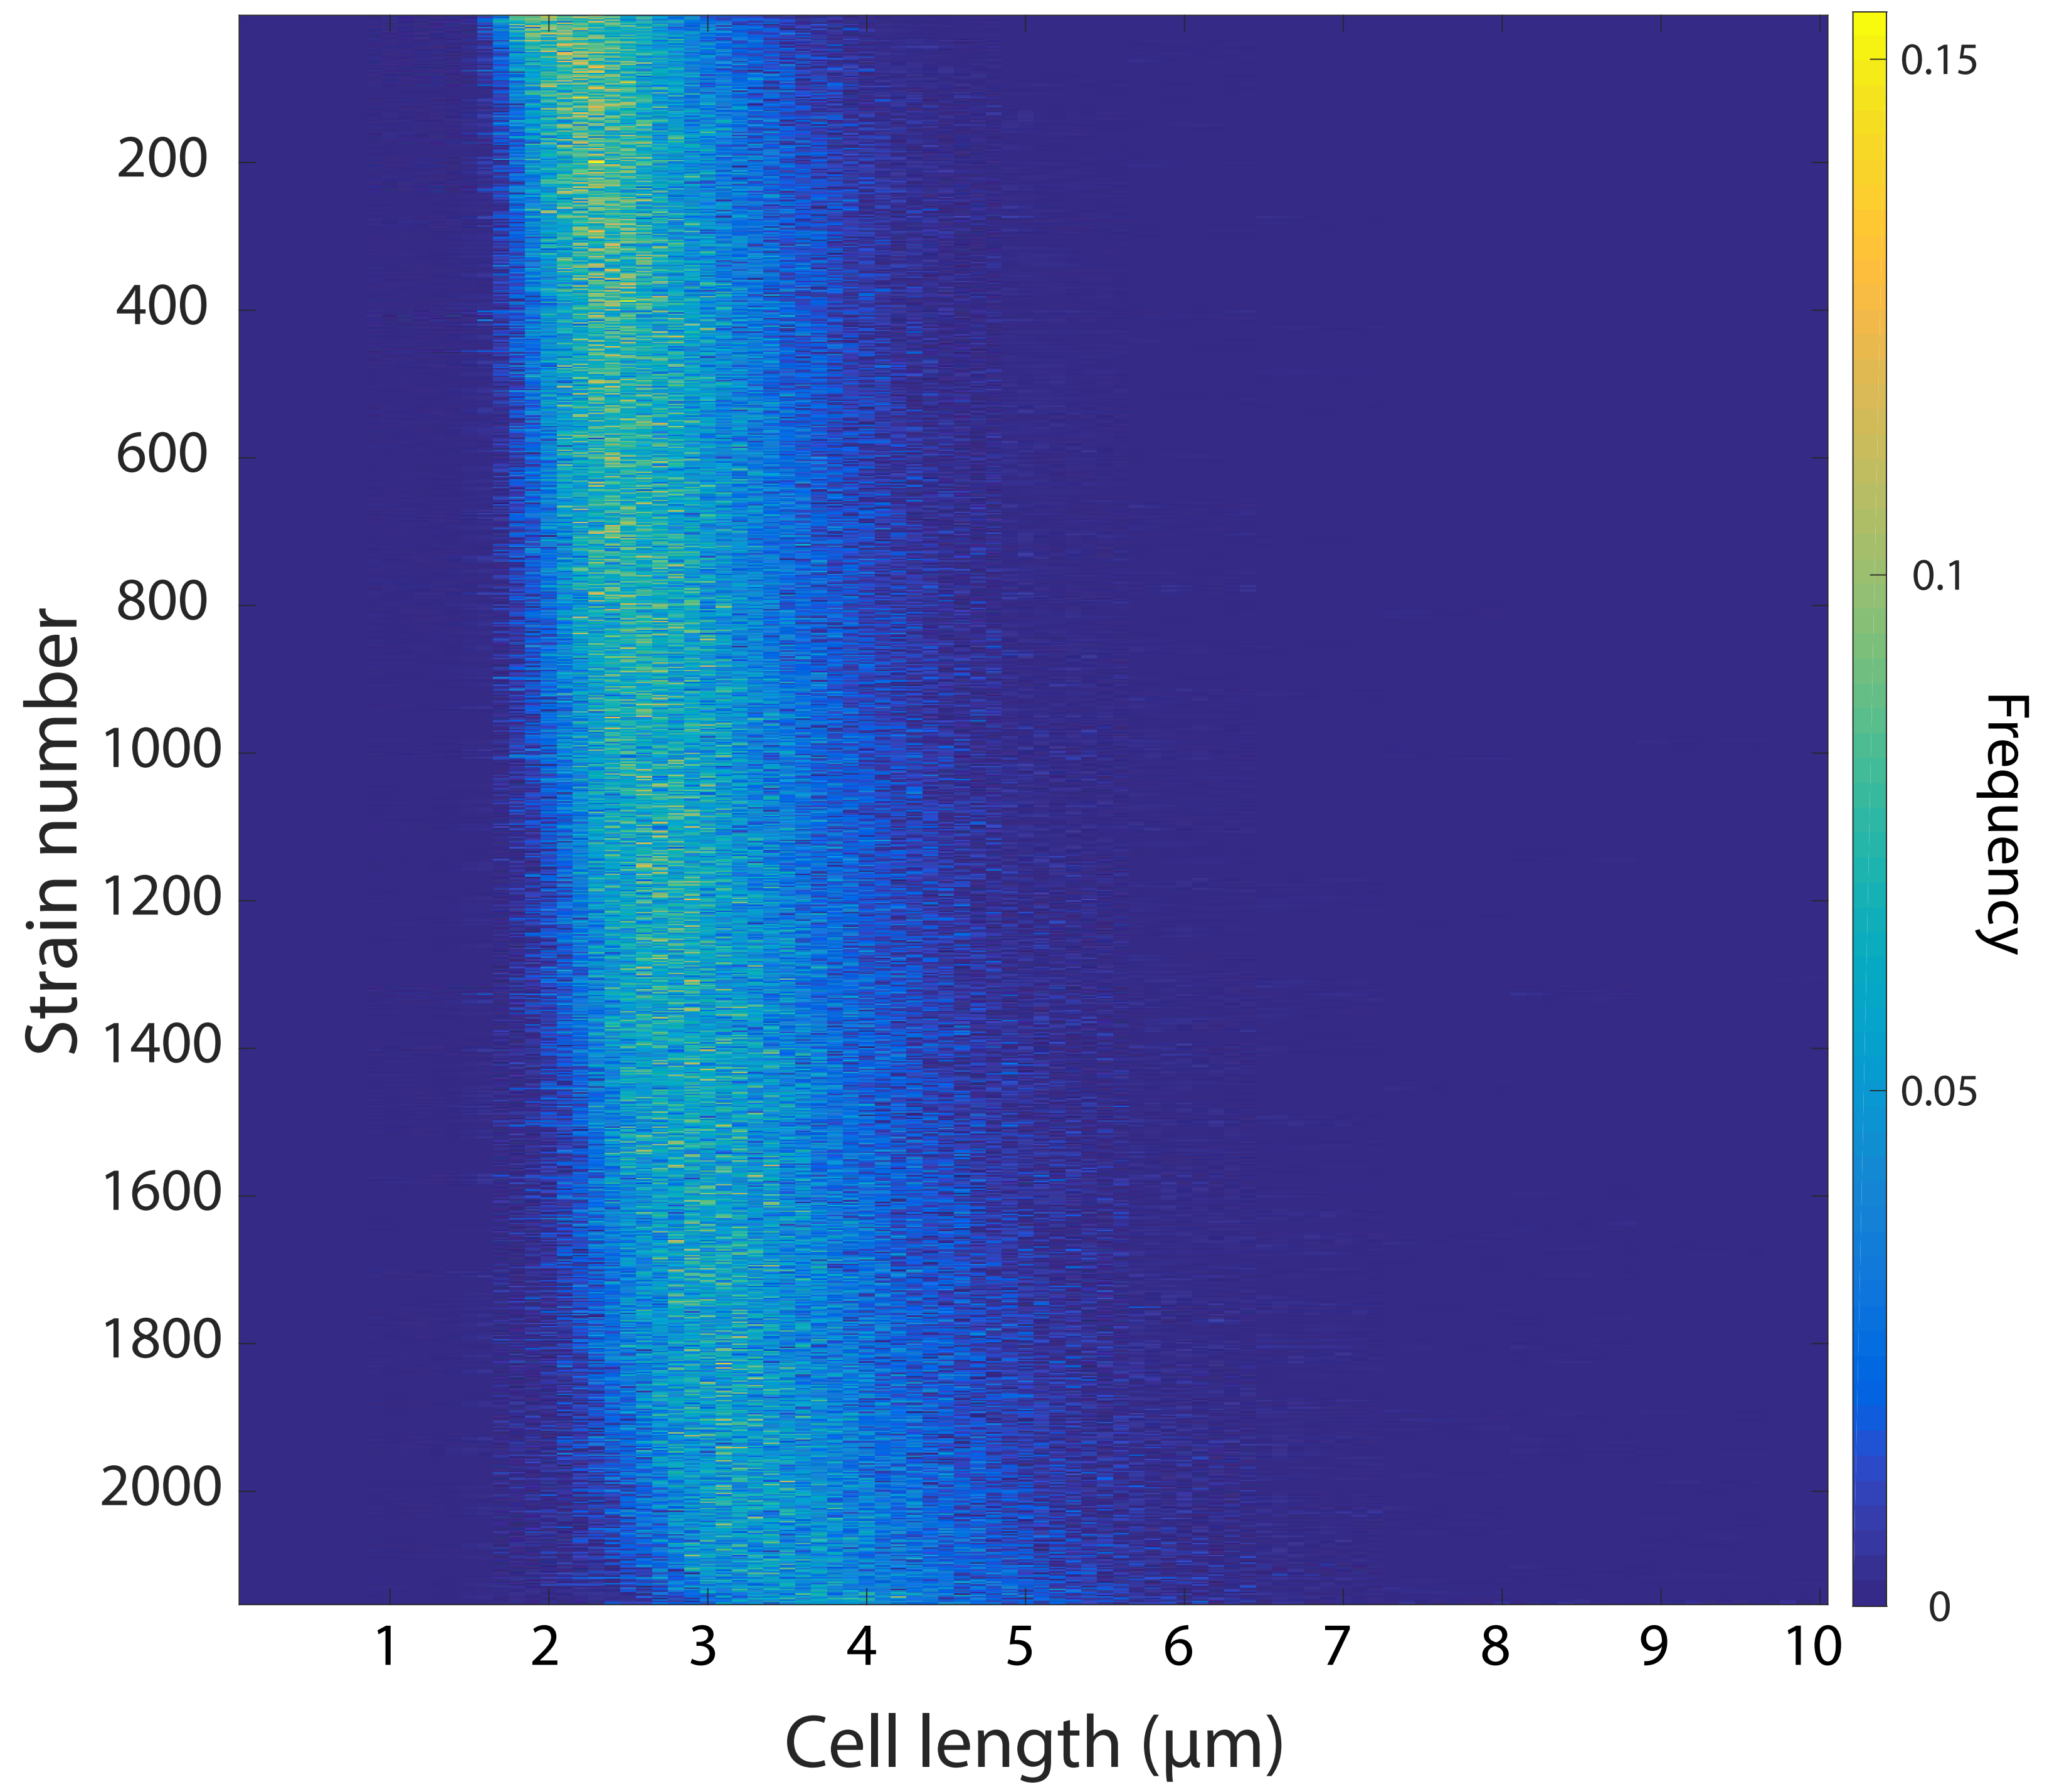

Supplement: 12915_2017_348_MOESM2_ESM.pdf [file 12915_2017_348_MOESM2_ESM.pdf]
