# Supplementary material for: Rapid, precise quantification of bacterial cellular dimensions across a genomic-scale knockout library
Source: PubMed Central journal article supplement (PMC5320674; doi:10.1186/s12915-017-0348-8), 2017-02-21
Supplement: 12915_2017_348_MOESM5_ESM.pdf [file 12915_2017_348_MOESM5_ESM.pdf]

**A**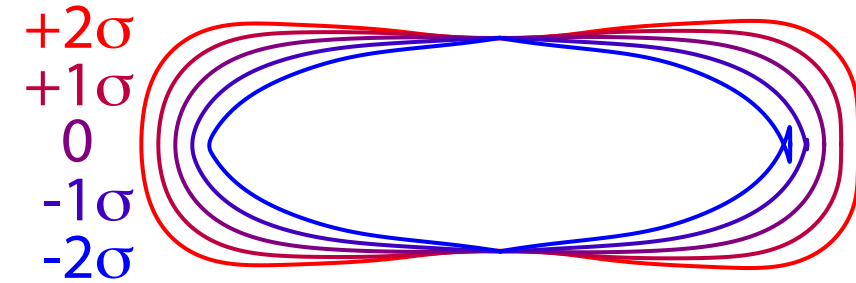

Polar curvature (58.10%)

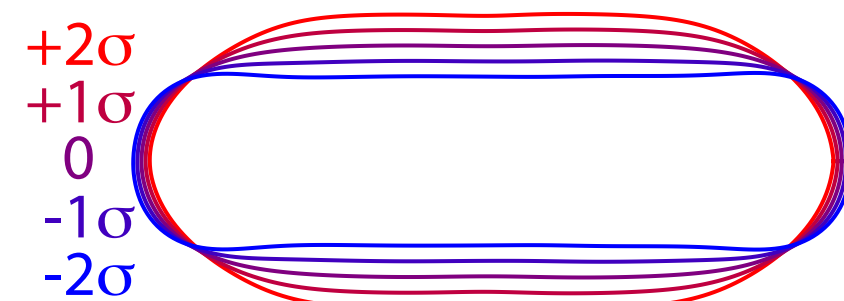

Width (20.25%)

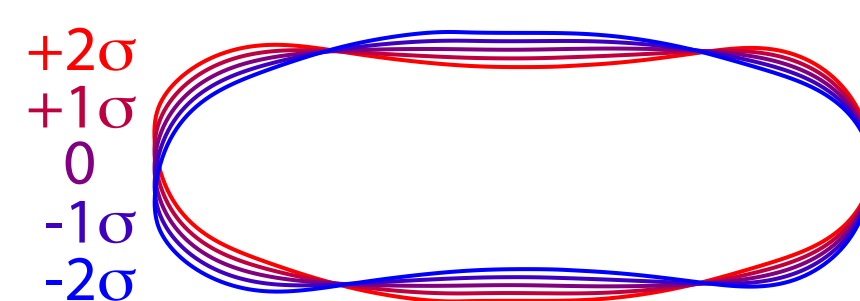

Bending (12.9%)

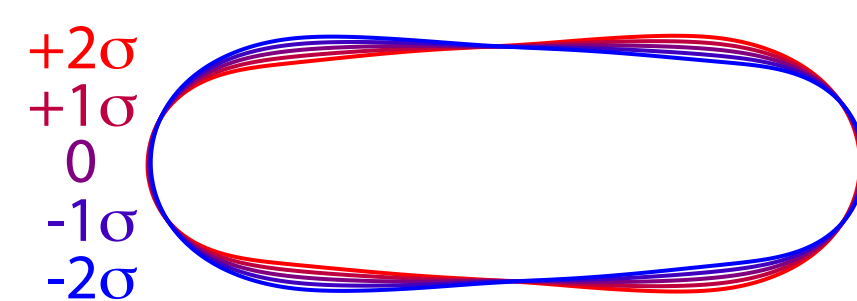

Tapering (2.26%)

**B**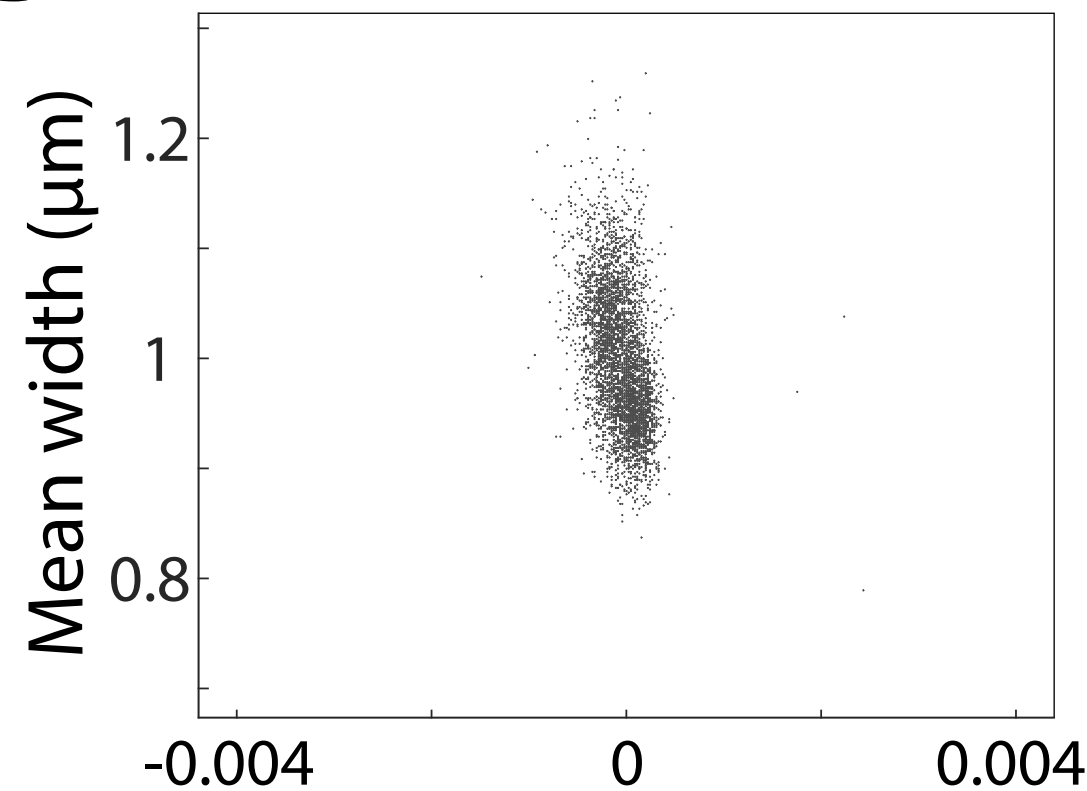

Mode 1 projection

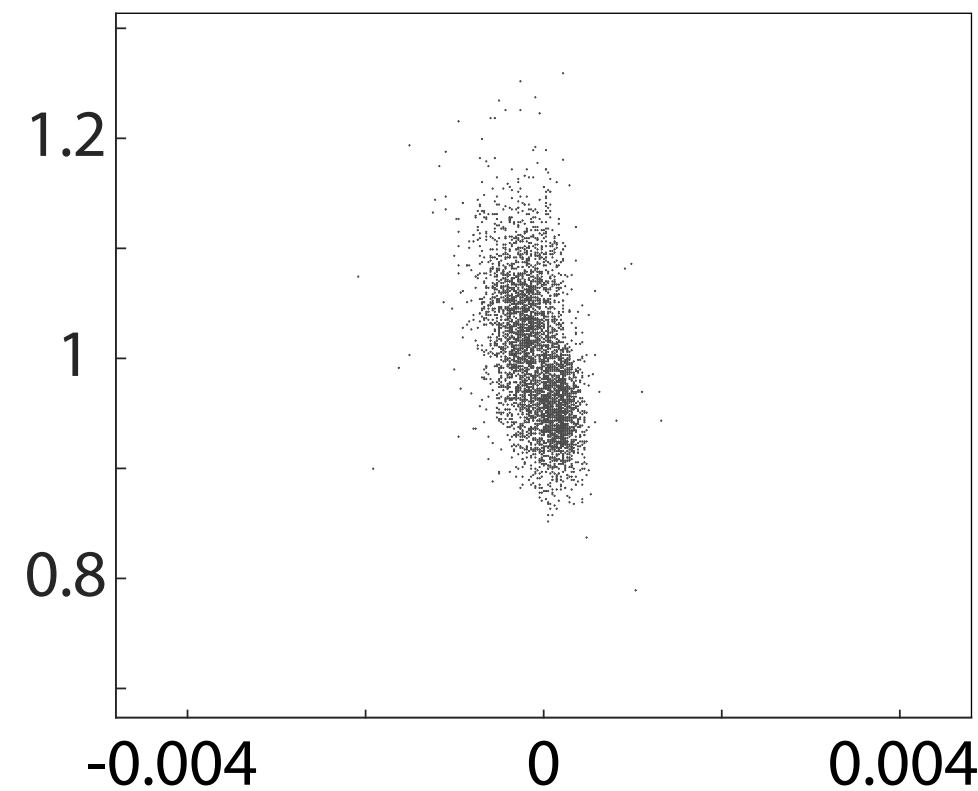

Mode 2 projection

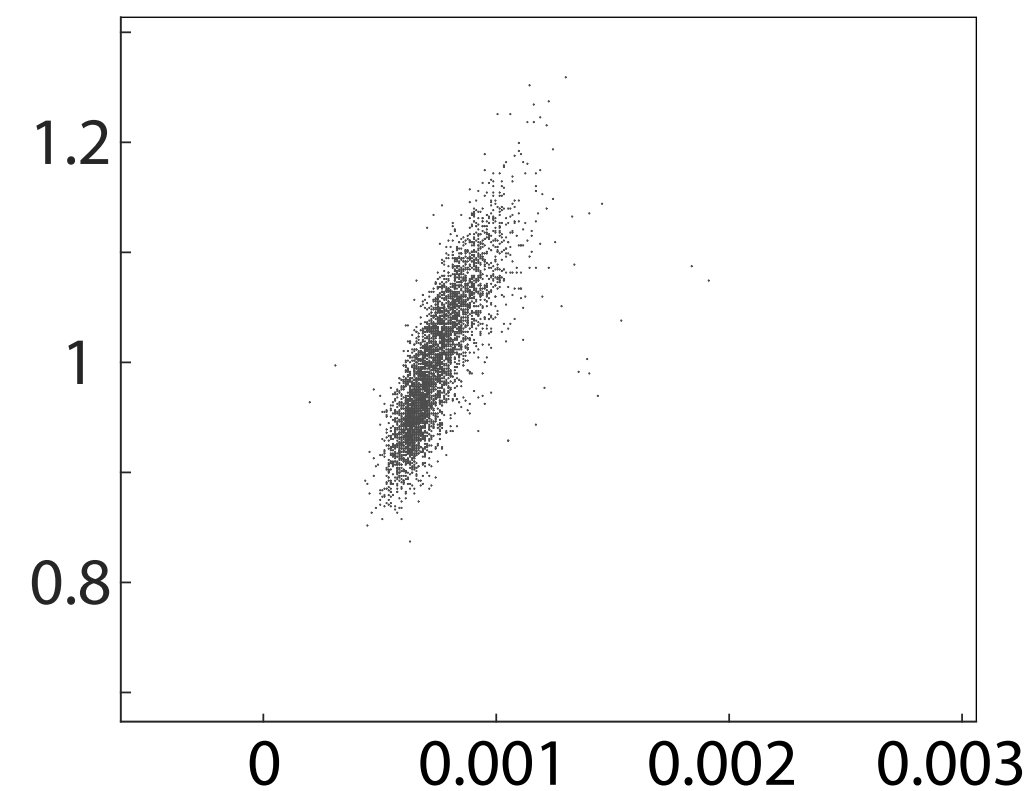 $|\text{Mode 3 projection}|$ 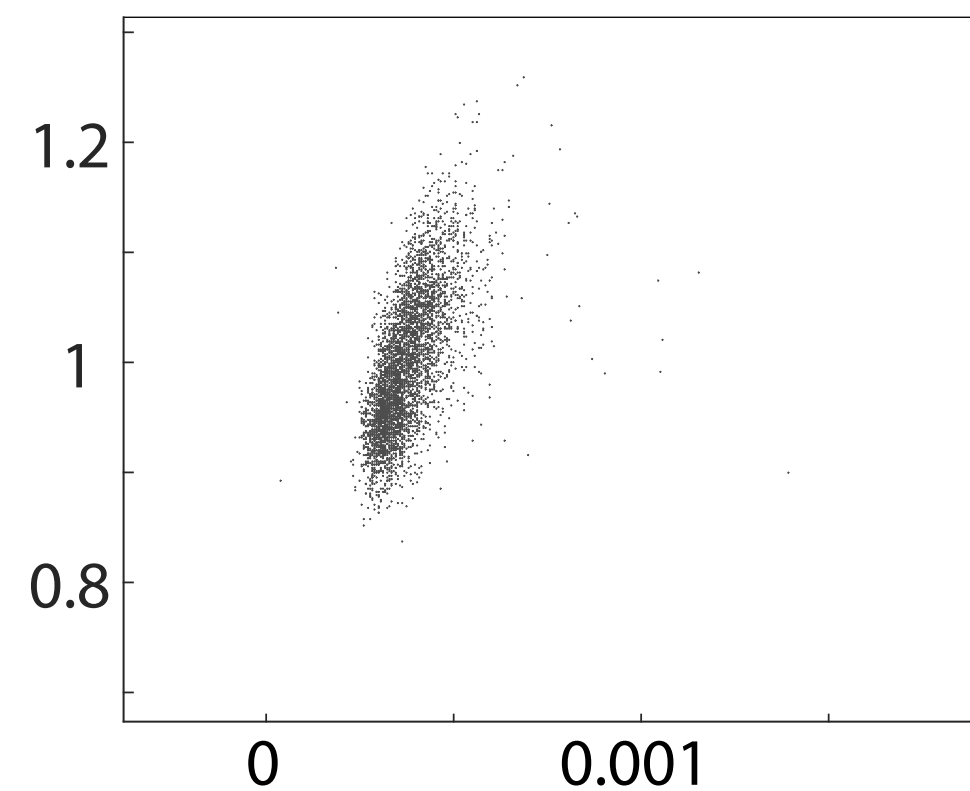 $|\text{Mode 4 projection}|$
